# Supplementary material for: Multiple Mutations Associated with Emergent Variants Can Be Detected as Low-Frequency Mutations in Early SARS-CoV-2 Pandemic Clinical Samples
Source: MDPI journal article supplement (doi:10.3390/v14122775), 2022-12-13
Supplement: s1 [file s1]

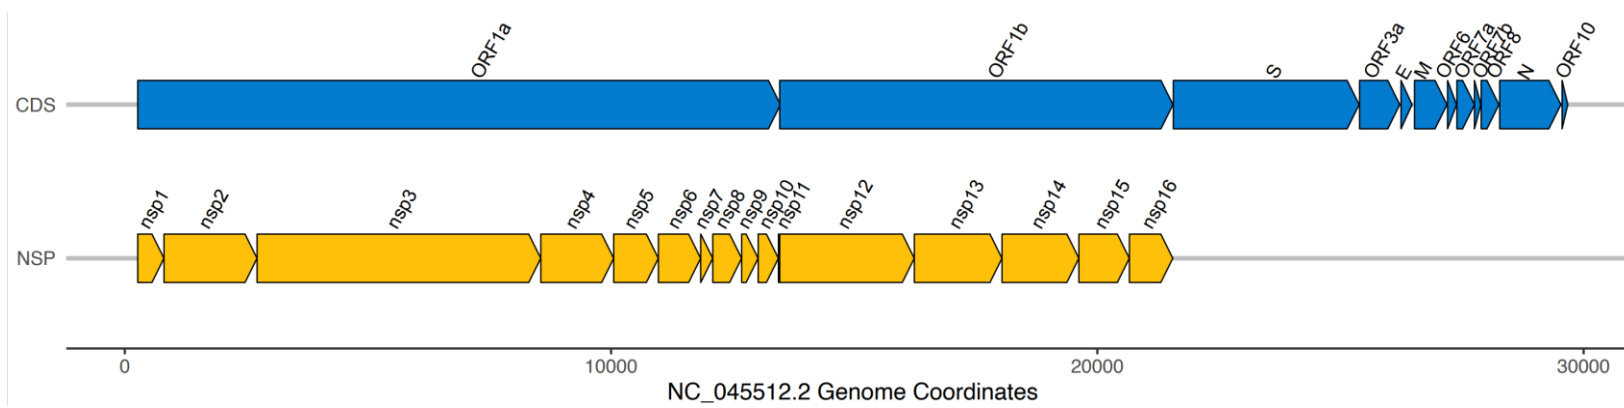

**Figure S1. SARS-CoV-2 genome structure**

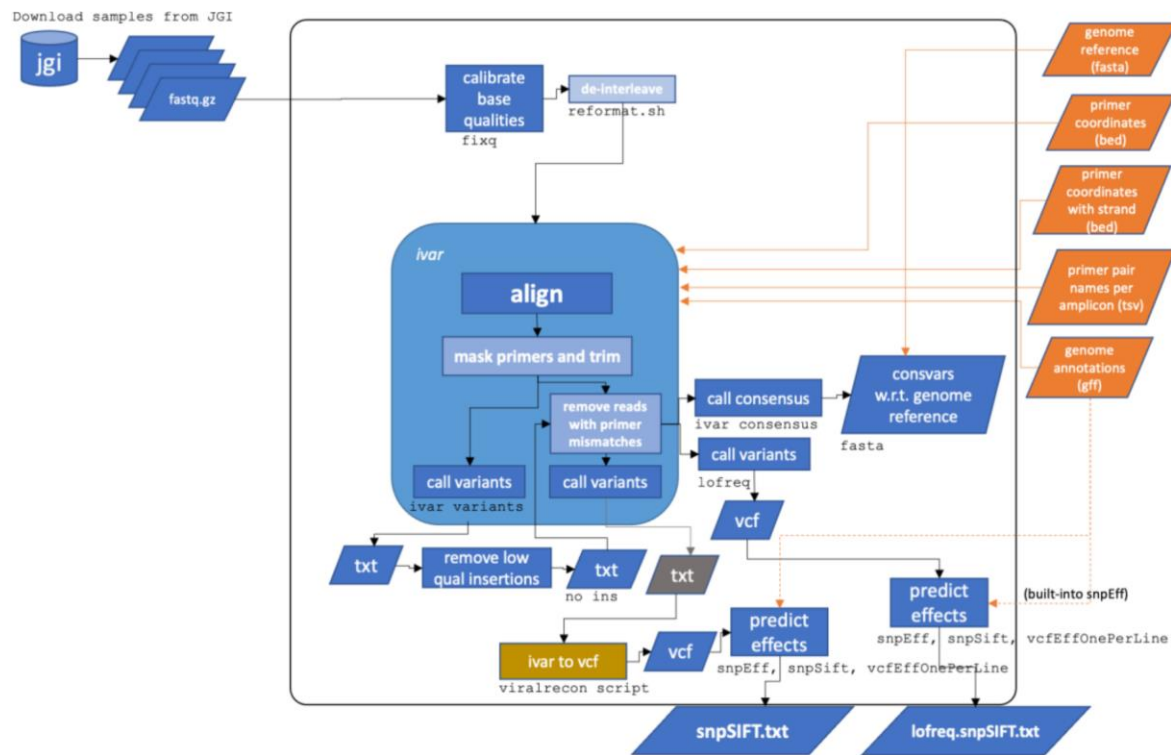

**Figure S2. Mappgene pipeline components and data processing** (<https://github.com/LLNL/mappgene>)
